# Supplementary material for: Expression of PDLIM5 Spliceosomes and Regulatory Functions on Myogenesis in Pigs
Source: MDPI journal article supplement (doi:10.3390/cells13080720), 2024-04-21
Supplement: s1 [file s1]

## Supplementary Information

**Supplementary Table S1. The primer sequences for SqRT-PCR and qPCR**

| Primer name          | Primer sequences (5' to 3')                          | Product length (bp) |
|----------------------|------------------------------------------------------|---------------------|
| <i>GAPDH</i>         | F: TCGGAGTGAACGGATTTGGC<br>R: TGACAAGCTTCCCGTTCTCC   | 189                 |
| <i>PDLIM5</i> -total | F: GCAAAGCATCCCAGGCAAAT<br>R: CGCTGTGCGTAGGTATGTGA   | 294                 |
| <i>PDLIM5</i> -short | F: ACATACCTACGCACAGCGAT<br>R: CTGAAACTTCATGGTGCCAGTC | 237                 |
| <i>PDLIM5</i> -long  | F: GCTCCTGAATGCGGTCGTT<br>R: ATGTCGCCAGCCTCTATGG     | 224                 |
| <i>PCNA</i>          | F: GCAGAGCATGGACTCGTCTC<br>R: TTGGACATGCTGGTGAGGTT   | 120                 |
| <i>CCND1</i>         | F: TTGAAGGCGAGGTTCCAGTC<br>R: GCTGGTTCTCTAGGTCAGCC   | 163                 |
| <i>CDK4</i>          | F: GGCTACCTCCCGGTATGAAC<br>R: CATCCATCAGCCGGACAACA   | 227                 |
| Ki67                 | F: GCCACTTACCTCCATCGCTA<br>R: TATAGCGTTTCACTGCCGGG   | 300                 |
| MyoD                 | F: TCTAGCAACCCGAATCAGCG<br>R: TCGCTGTAATAGGTGCCGTC   | 290                 |
| MyHC                 | F: CAGTCTGACGCACCTGAACG<br>R: TTTTGCCTCGGTAGCCCTC    | 164                 |
| MyoG                 | F: CAGGGGTGCCCAGTGAA<br>R: CGTCCTCCACTGTGATGCTG      | 171                 |

**Supplementary Table S2. The primer sequences for SNP identification of the *PDLIM5* gene**

| Primers | Target regions (bp) | Primer sequences (5' to 3')                            | Amplicon sizes (bp) |
|---------|---------------------|--------------------------------------------------------|---------------------|
| P1      | -1927/-110          | F: CCTACGCCATTGTGGTGCT<br>R: TGAAGCCGTCGCGGAAAAAC      | 1820                |
| P2      | -1937/-1136         | F: TAACAAGCTGCCTACGCCATT<br>R: TTTCATTGGACGGTGCTAGTCC  | 801                 |
| P3      | -1359/+86           | F: GAGATTTGTCTCCCAAAGTTACCG<br>R: CAAGTGA CTCCGTTGCGTG | 1439                |

**Supplementary Table S3. The primer sequences for promoter region segmentation**

| Primers   | Primer sequences (5' to 3')                                                                | Target regions (bp) |
|-----------|--------------------------------------------------------------------------------------------|---------------------|
| Promoter1 | F: tctatcgataggtaccCCTACGCCATTGTGGTGCT<br>R: agtaccggaatgccaaagcttCAAGTGACTCCGTTGCGTG      | -1927/+86           |
| Promoter2 | F: tctatcgataggtaccGAGATTTGTCTCCCAAAGTTACCG<br>R: agtaccggaatgccaaagcttCAAGTGACTCCGTTGCGTG | -1439/+86           |
| Promoter3 | F: tctatcgataggtaccCCAAGTCTTCAAAATCCAGTGTGC<br>R: agtaccggaatgccaaagcttCAAGTGACTCCGTTGCGTG | -1054/+86           |
| Promoter4 | F: tctatcgataggtaccCTGGAAACTGAACCACTGAGCT<br>R: agtaccggaatgccaaagcttCAAGTGACTCCGTTGCGTG   | -521/+86            |
